# Supplementary material for: In situ fluorescence of lac dye stabilized gold nanoparticles; DNA binding assay and toxicity study
Source: Royal Society of Chemistry journal article supplement (doi:10.1039/c6nj00087h), 2016-01-01
Supplement: c6nj00087h1.pdf [file c6nj00087h1.pdf]

## Supplementary materials for

### ***In-situ* Fluorescence of Lac dye stabilized gold nanoparticles; DNA binding assay and toxicity study**

Sutanuka Pattanayak,<sup>a</sup> Sharmila Chakraborty,<sup>b</sup> Md. Masud Rahaman Mollick,<sup>c</sup>  
Indranil Roy,<sup>c</sup> Samita Basu,<sup>d</sup> Dipak Rana,<sup>e</sup> Samiran Sona Gauri,<sup>f</sup> Dipankar  
Chattopadhyay,<sup>c</sup> Mukut Chakraborty<sup>\*a</sup>

<sup>a</sup> *Department of Chemistry, West Bengal State University, Barasat, Kolkata-700126, WB, India*

<sup>b</sup> *Department of Microbiology, Sammilani Mahavidyalaya, Baghajatin, E.M. Bypass, Santoshpur, Kolkata-700094, WB, India*

<sup>c</sup> *Department of Polymer Science & Technology, University of Calcutta, 92 A.P.C. Road, Kolkata-700009, WB, India*

<sup>d</sup> *Chemical Sciences Division, Saha Institute of Nuclear Physics, 1/AF, Bidhannagar, Kolkata-700064, WB, India*

<sup>e</sup> *Department of Chemical and Biological Engineering, Industrial Membrane Research Institute, University of Ottawa, 161 Louis Pasteur St., Ottawa, ON, K1N 6N5, Canada*

<sup>f</sup> *Department of Biotechnology, IIT Kharagpur, Kharagpur-721302, West Bengal, INDIA.*

\* Corresponding author. Tel: +91-9830160462; Fax: +91-33-25241977

*E-mail address:* mukutchem@yahoo.co.in

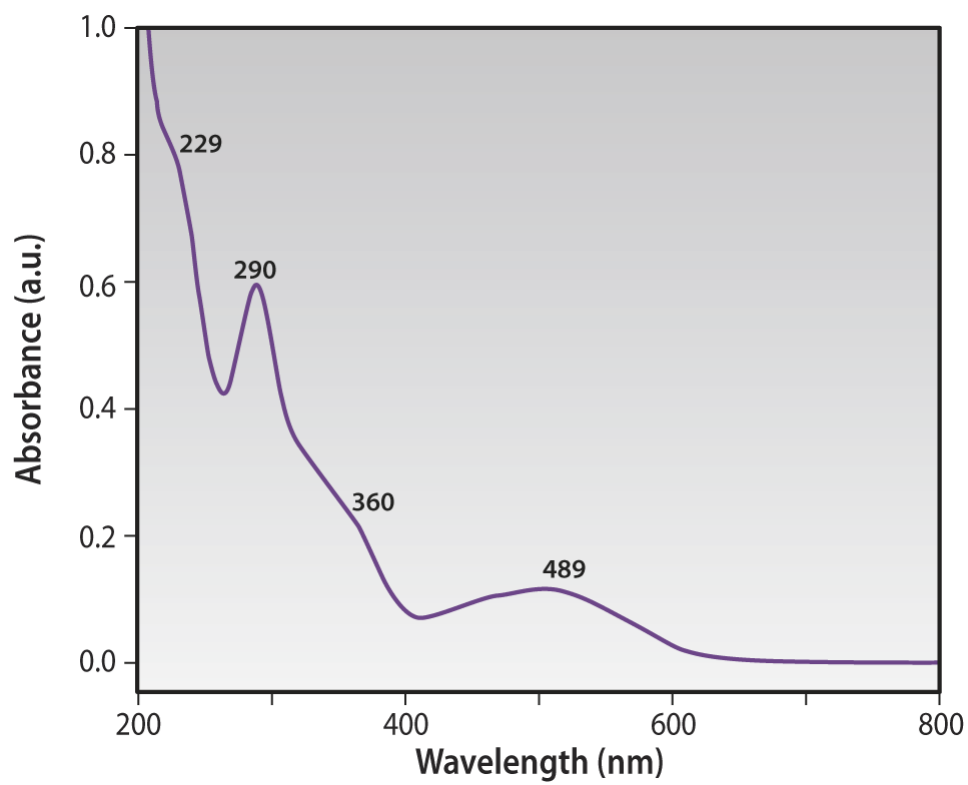

**Fig. S1** UV-Vis spectrum of Lac extract showing different absorption maxima.

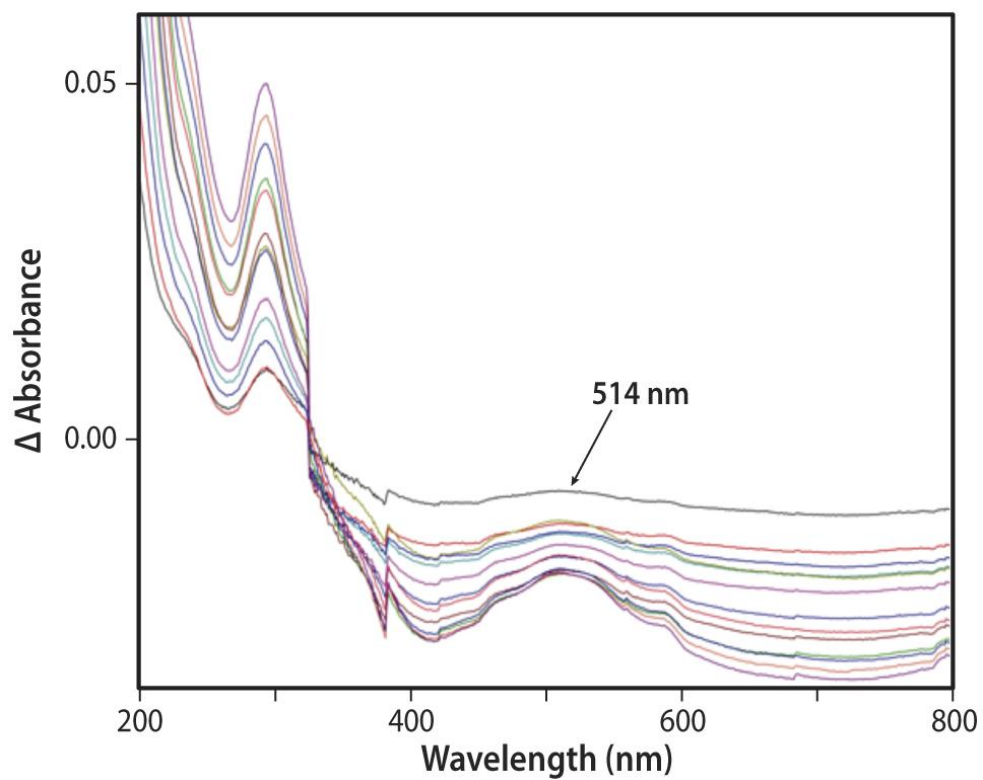

**Fig. S2** Differential absorption spectroscopic study of DNA-Lac interaction. New peak at 514 nm proves the formation of the complex.

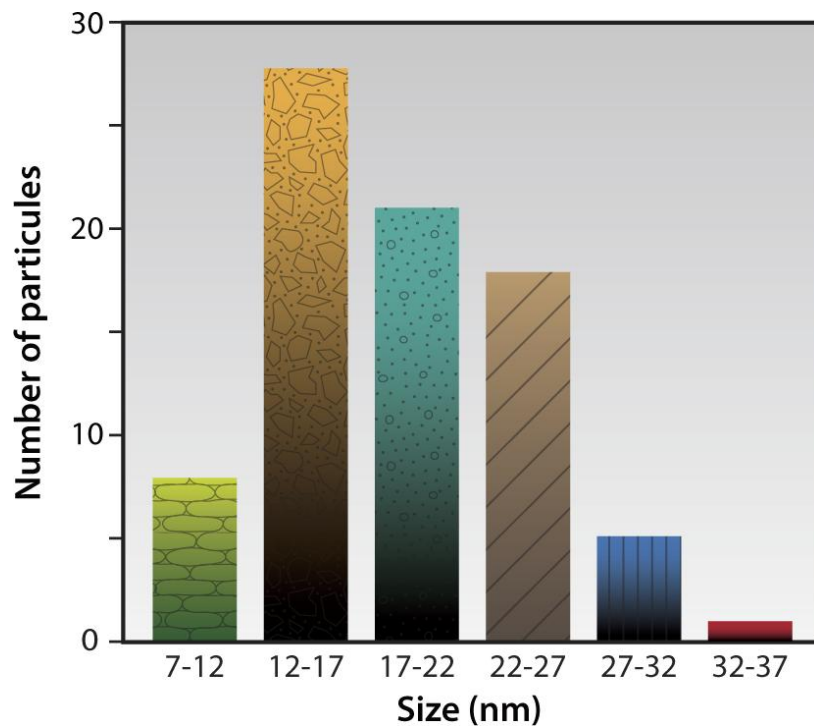

**Fig. S3** TEM histogram to determine average diameter of AuNPs.

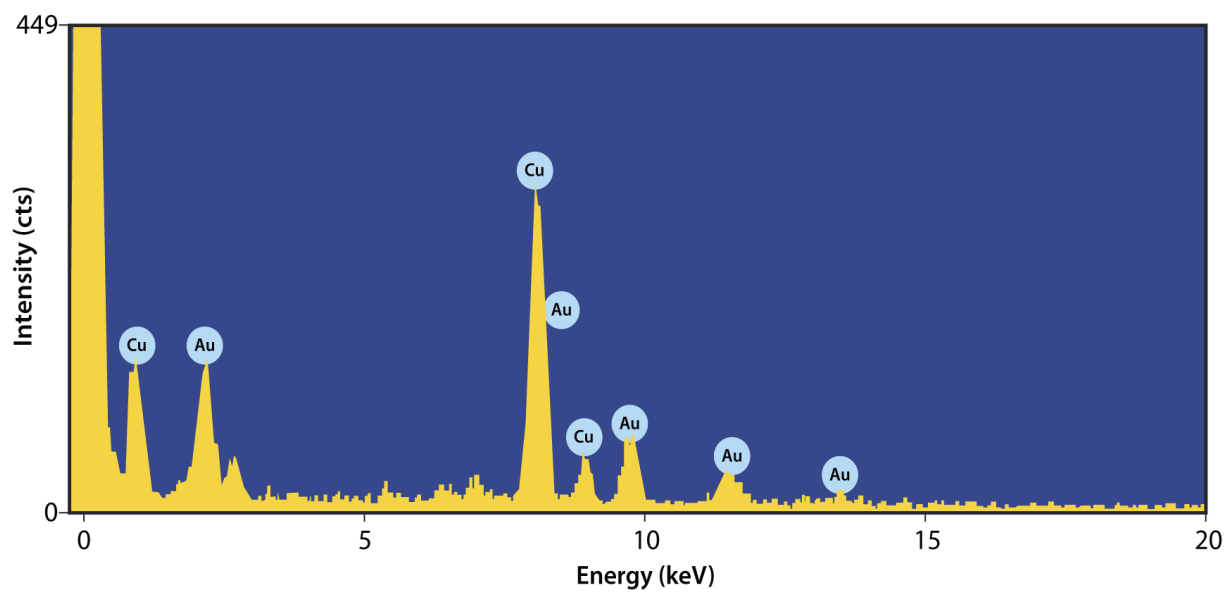

**Fig. S4** Energy dispersive X-ray spectrum of AuNPs.

**Table. S1.** Tabular expression of the antimicrobial activity of Lac stabilized AuNPs on both Gram positive and Gram negative bacteria.

| <b>ORGANISMS USED</b>                 | <b>Gram negative</b>    | <b>Gram positive</b>     |
|---------------------------------------|-------------------------|--------------------------|
| <b>COMPOUND</b>                       | <i>Escherichia coli</i> | <i>Bacillus subtilis</i> |
| <b>Sterile water</b>                  | <b>0</b>                | <b>0</b>                 |
| <b>Gold nanoparticles supernatant</b> | <b>0</b>                | <b>0</b>                 |
| <b>Gold nanoparticles</b>             | <b>0</b>                | <b>0</b>                 |
